# Supplementary material for: Development and Validation of Nutrition Environment Scoring for Chinese Style University/Work-Site Canteens (NESC-CC) and Oil–Salt Visual Analogue Scale (OS-VAS)
Source: MDPI journal article supplement (doi:10.3390/ijerph192114169), 2022-10-29
Supplement: s1 [file s1]

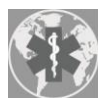

**Supplement File S1 Nutrition Environment Scoring for Chinese Style University/Work-site Canteens (NESC-CC).**

**Nutrition Environment Scoring for Chinese Style University/Work-site Canteens (NESC-CC)**

**Date: Scoring period: Canteen: Rater:**

**Part 1 Healthiness of ingredients and food content**

**Table S1 Staple foods**

| Healthy Choices                                                                                                                                                                                                                                                                                                         |           |               |
|-------------------------------------------------------------------------------------------------------------------------------------------------------------------------------------------------------------------------------------------------------------------------------------------------------------------------|-----------|---------------|
|                                                                                                                                                                                                                                        |           |               |
|                                                                                                                                                                                                                                                                                                                         | Quantity  | Score         |
| Copyright: © 2022 by the authors. Licensee MDPI, Basel, Switzerland. This article is an open access article distributed under the terms and conditions of the Creative Commons Attribution (CC BY) license ( <a href="https://creativecommons.org/licenses/by/4.0/">https://creativecommons.org/licenses/by/4.0/</a> ). |           |               |
| Total number of staple foods                                                                                                                                                                                                                                                                                            |           |               |
| Number of staple foods without added oil, salt and sugar                                                                                                                                                                                                                                                                | ≥5        | 1 pt          |
| Number of staple foods containing whole grains, starchy beans and potato/sweet potato (at least 20%)                                                                                                                                                                                                                    | ≥3<br>≥6  | 1 pt<br>2 pts |
| Rice-based staple foods that contain at least 20% whole grains (including fried rice, rice rolls, etc.)                                                                                                                                                                                                                 | Yes<br>≥3 | 1 pt<br>2 pts |
| Rice-based staple foods that contain at least 50% whole grains                                                                                                                                                                                                                                                          | Yes       | 1 pt          |
| Porridge with at least 50% whole grains                                                                                                                                                                                                                                                                                 | Yes       | 1 pt          |
| Pasta such as steamed buns, pancakes, soba noodles, naked oat noodles, and bread that contain at least 20% whole grains                                                                                                                                                                                                 | Yes<br>≥3 | 1 pt<br>2 pts |
| Staple foods containing at least 20% starchy legumes                                                                                                                                                                                                                                                                    | Yes       | 1 pt          |
| Steamed/boiled whole corn or corn kernels (without added oil, salt, sugar)                                                                                                                                                                                                                                              | Yes       | 1 pt          |
| Steamed/boiled/roasted sweet potatoes/yams/taros/potatoes (without added oil, salt, sugar)                                                                                                                                                                                                                              | Yes       | 1 pt          |
| A “grain basket” that mixes various food categories such as potatoes, whole grains, beans, nuts, etc.                                                                                                                                                                                                                   | Yes       | 1 pt          |
| Staple foods containing dairy or soy                                                                                                                                                                                                                                                                                    | Yes       | 1 pt          |
| Total number of staple food ingredients                                                                                                                                                                                                                                                                                 | ≥5<br>≥8  | 1 pt<br>2 pts |
| Total score                                                                                                                                                                                                                                                                                                             |           |               |
| Range of scores for this section                                                                                                                                                                                                                                                                                        |           | 0–16          |
| * Soups and drinks with small amounts of grains are not counted.* Fried whole grains or potatoes can not get points.* Foods with more than 5% added sugar, and foods with strong sweetness get no point, but foods with natural sweetness such as sweet corn, sweet potatoes, and water chestnuts can get points.       |           |               |

**Table S2 Vegetables**

| Healthy Choices                                       | Quantity                                                  | Score |
|-------------------------------------------------------|-----------------------------------------------------------|-------|
| Total number of dishes                                |                                                           |       |
| Total number of dishes with vegetables (at least 50%) | ≥10 or at least 60% of the total number of dishes<br>1 pt |       |

|                                                                                                                              |                      |
|------------------------------------------------------------------------------------------------------------------------------|----------------------|
| Number of dishes with at least 80% vegetables                                                                                | ≥5 1 pt<br>≥8 2 pts  |
| Number of dishes containing dark green leafy vegetables (at least 50%)                                                       | ≥3 1 pt<br>≥5 2 pts  |
| Number of dishes containing orange/yellow/red vegetables (at least 50%)                                                      | ≥2 1 pt              |
| Number of dishes containing fungus, algae vegetables(at least 20%)                                                           | ≥2 1 pt              |
| Number of dishes containing tender legume vegetables such as sweet pea, edamame, vegetable broad beans, etc.(at least 20%)   | Yes 1 pt             |
| Self-selected boiled/blanched/steamed vegetables (including Mala Tang(spicy hot pot), etc.)                                  | Yes 1 pt<br>≥3 2 pts |
| Vegetables mixed with staple food (vegetables added to steamed rice, bibimbap, fried rice) (more than 25% of total weight)   | Yes 1 pt             |
| Vegetable salads of Western or Chinese style                                                                                 | ≥3 1 pt              |
| Vegetables claimed to to have reduced amounts of oil/salt                                                                    | Yes 1 pt<br>≥3 2 pts |
| Number of vegetable ingredients (at least 20% of the raw materials)<br>(including beans, algae, fungus and other vegetables) | ≥5 1pt<br>≥10 2pts   |
| Total score                                                                                                                  |                      |
| Range of scores for this section                                                                                             | 0–16                 |

\* Soups with a small amount of vegetables can not get points. \* Starchy vegetables such as potatoes, sweet potatoes and purple potatoes do not score, but lotus root, water chestnuts and yam can get points. \* Fried vegetables can not get points.

**Table S3 Meat, eggs and aquatic products**

| Healthy Choices                                                                                              | Quantity             | Score |
|--------------------------------------------------------------------------------------------------------------|----------------------|-------|
| Number of dishes containing fish/meat/egg (including animal blood and offal, content at least 25%)           | ≥5 1 pt              |       |
| Dishes containing non-fried fish and other aquatic animal products (content at least 50%)                    | Yes 1 pt<br>≥3 2 pts |       |
| Steamed, boiled or roasted chicken/duck/other poultry food (pure meat content 40–100 g)                      | Yes 1 pt             |       |
| Red meat including steamed, stewed or roasted beef/mutton/pork (pure meat content 40–100 g)                  | Yes 1 pt             |       |
| Egg-containing dishes (at least 25 g eggs)                                                                   | Yes 1 pt             |       |
| Dishes containing eggs that are not fried(steamed eggs, boiled eggs or salads containing at least 25 g eggs) | Yes 1 pt             |       |
| Total score                                                                                                  |                      |       |
| Range of scores for this section                                                                             | 0–7                  |       |

\* Soups that contain only a small amount of meat or eggs do not score. \* Fried aquatic products do not score.

**Table S4 Plant-based protein foods**

| Healthy Choices                                          | Quantity | Score |
|----------------------------------------------------------|----------|-------|
| Number of dishes containing plant protein (at least 20%) |          |       |

|                                                                                                                                                           |     |       |
|-----------------------------------------------------------------------------------------------------------------------------------------------------------|-----|-------|
| Number of dishes containing non-fried soy products (tofu, dried tofu, yuba, etc.) (at least 20%)                                                          | ≥2  | 1 pt  |
| Number of dishes with non-fried soy protein (at least 50%)                                                                                                | ≥2  | 1 pt  |
|                                                                                                                                                           | ≥5  | 2 pts |
| Number of dishes containing other non-fried plant protein (at least 20%)(including soybean sprouts, chickpeas, kidney beans, peanuts, natto, tempeh etc.) | ≥2  | 1 pt  |
|                                                                                                                                                           | ≥5  | 2 pts |
| Foods containing unfried/unsweetened nuts/oilseeds, including dishes or staple foods (at least 20%)                                                       | ≥3  | 1 pt  |
|                                                                                                                                                           | ≥5  | 2 pts |
| Total score                                                                                                                                               |     |       |
| Range of scores for this section                                                                                                                          | 0–7 |       |

\* Plant meat substitutes such as textured vegetable protein (TVP) are included in plant protein. \* Salads and Chinese salads with plant protein are also included. \* Foods containing fried/sweetened nuts or oilseeds do not score.

Table S5 Fruits

| Healthy Choices                                                          | Quantity | Score |
|--------------------------------------------------------------------------|----------|-------|
| Number of fruit foods                                                    |          |       |
| Fresh fruit available (including cut fruit)                              | Yes 1 pt |       |
|                                                                          | ≥3       | 2 pts |
| Dried fruit available (5–25 g per serving)                               | Yes 1 pt |       |
| A separate window or counter to sell small portions of fresh/dried fruit | Yes 1 pt |       |
| Total score                                                              |          |       |
| Range of scores for this section                                         | 0–4      |       |

\* Salad fruits included. \* Drinks containing fruit are not included. \* Desserts containing fruit/dried fruit do not score.

Table S6 Dairy and soy beverages

| Healthy Choices                                                                                   | Quantity | Score |
|---------------------------------------------------------------------------------------------------|----------|-------|
| Number of dairy and soy beverages                                                                 |          |       |
| Plain soy milk or soy nut milk                                                                    | Yes 1 pt |       |
| Plain milk (skimmed, low-fat or full-fat, protein content ≥ 2.9%)                                 | Yes 1 pt |       |
| Yogurt (skimmed, low-fat or full-fat, protein content ≥ 2.9%)                                     | Yes 1 pt |       |
| Homemade sugar-free whole grain soy milk(Mixed pulp of soybean, nut, oilseed and multigrain etc.) | Yes 1 pt |       |
| Total score                                                                                       |          |       |
| Range of scores for this section                                                                  | 0–4      |       |

\* Beverages in the canteen are not included, and only beverages served in the dining area. \* Sweetened homemade beverages with less than 50% milk/soymilk/nut content and added sugar do not score.

Table S7 Other beverages

| Healthy Choices                                                                                 | Quantity  | Score |
|-------------------------------------------------------------------------------------------------|-----------|-------|
| Number of other beverages                                                                       |           |       |
| Free direct drinking water or boiled water                                                      | Yes 2 pts |       |
| Free plain soup with grains and beans (rice soup, millet soup, corn soup, mung bean soup, etc.) | Yes 1 pt  |       |

|                                                                                         |           |
|-----------------------------------------------------------------------------------------|-----------|
| Free unsweetened lemonade, barley tea, buckwheat tea, etc.                              | Yes 1 pt  |
| Free vegetable soup of negligible content of fat and salt                               | Yes 1 pt  |
| Unsweetened flower and fruit tea/original tea/black coffee available (chargeable)       | Yes 1 pt  |
| 100% fruit juice                                                                        | No point  |
| Coffee with milk and sugar                                                              | No point  |
| Diet coke/soda with sweeteners                                                          | No point  |
| Sugar-sweetened beverages including fruit drinks and sweetened flavored milk tea drinks | Yes -1 pt |
| Alcoholic beverages                                                                     | Yes -1 pt |
| Total score                                                                             |           |
| Range of scores for this section                                                        | -2-6      |

\* Beverages from the canteen are not included, only those served in the dining area. \* Grain soups are limited to very thin types, with more dry matter being graded as porridge. \* Soups that are distinctly salty or sweet do not score.

|                   |  |       |
|-------------------|--|-------|
| Total for Part 1: |  |       |
| Range for Part 1: |  | -2-60 |

## Part 2 Other factors that support healthy choices

**Table S8 Service policies**

|                                                    | Health-Related Services                              | Score               |
|----------------------------------------------------|------------------------------------------------------|---------------------|
| Combos                                             | Combos with different portion sizes/calories         | Yes 1 pt            |
|                                                    | Portion size reduction of staple foods on request    | Yes 1 pt            |
|                                                    | Extra supply of vegetables on request                | Yes 1 pt            |
| Dishes                                             | Half portion choices without extra charge            | Yes 2 pt            |
| Staple foods                                       | Portion size reduction on request                    | Yes 1 pt            |
| Steamed buns, cakes, rice noodles, pan-cakes, etc. | Small portion available/portion size can be reduced  | Yes 1 pt<br>≥3 2pts |
| Porridge                                           | Optional no added sugar/salt                         | Yes 1 pt            |
| Soy milk/nut milk                                  | Optional no added sugar                              | Yes 1 pt            |
| Salad/Chinese salad/noodles/set meal etc.          | Low-fat or low-salt dressings available              | Yes 1 pt            |
|                                                    | Amount of salad dressing/sauce adjustable on request | Yes 1 pt            |
| Total score                                        |                                                      |                     |
| Range of scores for this section                   |                                                      | 0-12                |

**Table S9 Information environment**

|                            | Information that May Affect Choices                                       | Score    |
|----------------------------|---------------------------------------------------------------------------|----------|
| Dishes                     | A special window/promotion for fat-reduced dishes                         | Yes 1 pt |
|                            | A special window/promotion for salt-reduced dishes                        | Yes 1 pt |
| Staple foods               | Promotions for small servings of staple foods                             | Yes 1 pt |
|                            | Promotions for staple foods containing whole grains                       | Yes 1 pt |
| Combos                     | Promotions for nutritious combos                                          | Yes 1 pt |
|                            | Calorie reduction combos/fat reduction and muscle gain combos             | Yes 1 pt |
|                            | Example of a combo made of assorted healthy food                          | Yes 1 pt |
| Food nutrition information | Calorie/nutrient information available over the sales window/canteen area | Yes 1 pt |

|                                  |                                                                  |     |       |
|----------------------------------|------------------------------------------------------------------|-----|-------|
|                                  | Calorie/nutrient information available on webpages/mini-programs | Yes | 1 pt  |
| Health advice                    | Advice on healthy eating/nutrition balance available             | Yes | 1 pt  |
|                                  | Advice on food waste reduction available                         | Yes | 1 pt  |
| Healthy eating advocacy          | Publicity of Dietary Guidelines or correct nutritional knowledge | Yes | 1 pt  |
| Wrong information                | Incorrect health/diet information                                | Yes | −1 pt |
|                                  | Unscientific food advertisements/promotions                      | Yes | −1 pt |
| Total score                      |                                                                  |     |       |
| Range of scores for this section |                                                                  |     | −2–12 |

**Table S10 Equipments and facilities**

| Type of Facilities               | Equipments                                                                                                                         | Score |         |
|----------------------------------|------------------------------------------------------------------------------------------------------------------------------------|-------|---------|
| Cooking facilities               | There are enough steamers to make steamed dishes in addition to steaming rice                                                      | Yes   | 1 pt    |
|                                  | There are electric ovens for making roasted dishes without added fat                                                               | Yes   | 1 pt    |
|                                  | Microwave oven available for heating food                                                                                          | Yes   | 1 pt    |
|                                  | There are other cooking appliances that facilitate cooking with less oil                                                           | Yes   | 1 pt    |
| Quantitative tools               | There are utensils to help with healthy eating, such as healthy plates, rationing spoons, etc.                                     | Yes   | 1 pt    |
|                                  | Weighing scale available for easy understanding of food portions                                                                   | Yes   | 1 pt    |
|                                  | There are health testing equipment, such as weight scale, body fat scale, blood pressure monitor, body mass index calculator, etc. | Yes   | 1 pt    |
| Cleaning utensils                | There are facilities for diners to wash their hands and provide sanitizers, etc.                                                   | Yes   | 1 pt    |
| Garbage classification           | There are kitchen waste classification measures and careful implementation                                                         | Yes   | 1 pt    |
| Temperature control facilities   | There is air conditioning to ensure a comfortable dining temperature                                                               | Yes   | 1 pt    |
| Total score                      |                                                                                                                                    |       |         |
| Range of scores for this section |                                                                                                                                    |       | 0 to 10 |

**Table S11 Personnel training and management**

| Items                         | Details                                                                                                                    | Score |       |
|-------------------------------|----------------------------------------------------------------------------------------------------------------------------|-------|-------|
| Nutrition manager equipped    | At least 1 full-time registered dietitian available                                                                        | Yes   | 3 pts |
|                               | Equipped with at least 1 trained full-time registered dietitian                                                            | Yes   | 2 pts |
|                               | At least 1 part-time registered dietitian                                                                                  | Yes   | 1 pt  |
|                               | At least 1 trained non-registered part-time nutrition instructor                                                           | Yes   | 1 pt  |
| Nutrition manager training    | Regular training program by nutrition related professionals                                                                | Yes   | 1 pt  |
| Management system             | Meal committee consists of diners (staff, teachers and students)                                                           | Yes   | 1 pt  |
|                               | Evaluation mechanism for scoring and grading of nutrition and food safety quality                                          | Yes   | 1 pt  |
| Communication and interaction | There is a system for regular communication between food providers and diners to improve the quality of food and beverages | Yes   | 1 pt  |

|                                  |                                                                                                    |     |       |
|----------------------------------|----------------------------------------------------------------------------------------------------|-----|-------|
|                                  | Participatory activities that encourage diners to eat healthy foods                                | Yes | 1 pt  |
| Nutrition service capacity       | Having the ability to answering the questions and meet the demands on healthy eating of the diners | Yes | 1 pt  |
| Dishes development ability       | There are healthy dishes development activities every quarter                                      | Yes | 1 pt  |
| Total score                      |                                                                                                    |     |       |
| Range of scores for this section |                                                                                                    |     | 0–14  |
|                                  |                                                                                                    |     |       |
| Total for Part 2:                |                                                                                                    |     |       |
| Range for Part 2:                |                                                                                                    |     | –2–48 |

### Supplement File S2: The Oil-Salt Visual Analogue Scale (OS-VAS)

Dear diners:

Thank you very much for participating in our survey. This research is a non-commercial public health study, which aimed to explore a new approach to evaluation the use of cooking oil and salt in canteens based on the diner's perception. Please read the explanation given below and mark the scoring scales corresponding to each scoring item according to your real daily experience of dining. Since this is an anonymous survey, your do not need to attach any personal information in the survey.

The OS-VAS rated each of the 6 items (personal saltiness preference, oil consumption preference, overall saltiness of canteen dishes, overall oil consumption of canteen dishes, personal salt reduction demand, and personal oil reduction demand) subjectively, as shown in *Figure 1*. We calibrated each scale and tell the respondents how to mark the scale according to their sensory perception. We measured the distance of the marked location and the "0" origin of each scale as the value of score. The subjective perception of oil and salt use in a canteen is judged by calculating the average score of all respondents.

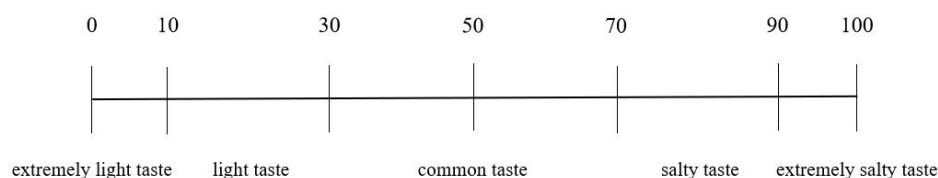

**Figure S1.** VAS of personal saltiness preference (S1).

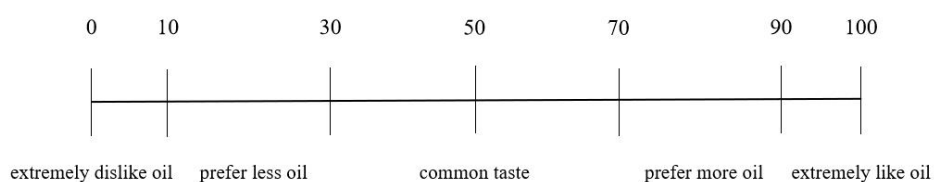

**Figure S2.** Personal oil consumption preference score, O1.

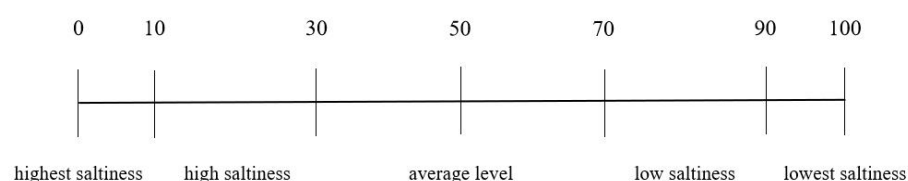

**Figure S3.** Overall salinity score of canteen dishes, S2.

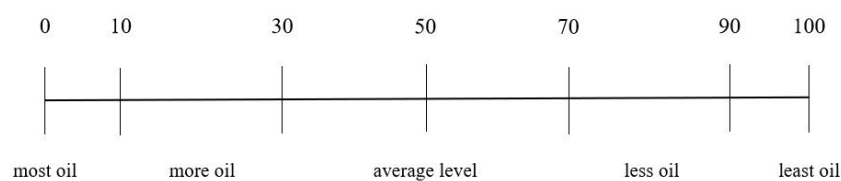

**Figure S4.** Overall oil consumption score of canteen dishes, O2.

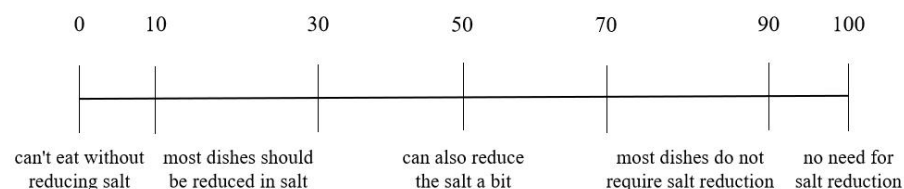

**Figure S5.** Score of salt reduction demand of canteen dishes, S3.

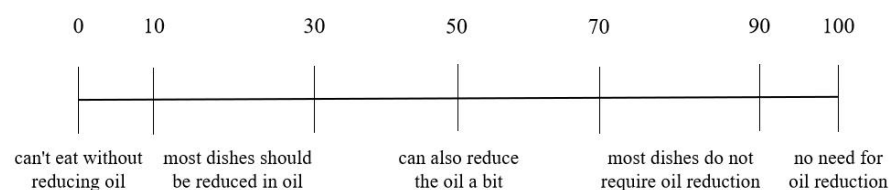

**Figure S6.** Score of oil reduction demand of canteen dishes, O3.

Thank you for your cooperation, Your scoring will provide very important help to our survey results. If you are interested in the result of the survey, please send your e-mail to hanyue-cau@163.com . You are welcome to the food nutrition laboratory in the Food Science Building for more information about our study. Have a nice meal!
